# Supplementary material for: The immunomodulatory quinoline-3-carboxamide paquinimod reverses established fibrosis in a novel mouse model for liver fibrosis
Source: PubMed Central journal article supplement (PMC6124744; doi:10.1371/journal.pone.0203228), 2018-09-05

S6 Fig

A

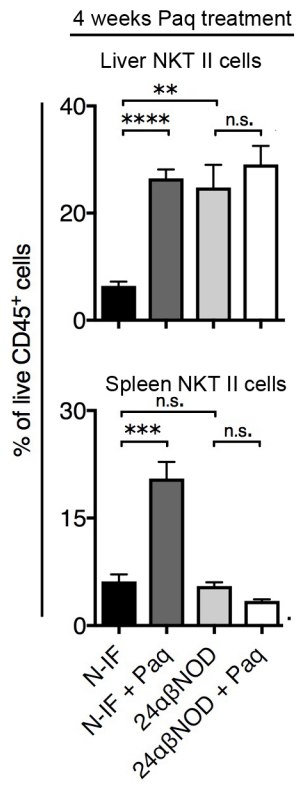

B

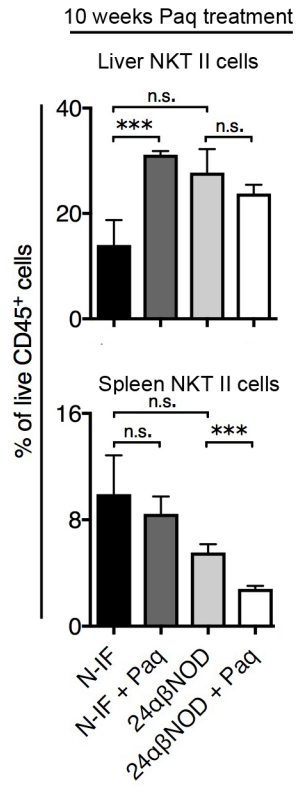

Supplement: pone.0203228.s006.pdf [file pone.0203228.s006.pdf]
